# Supplementary material for: Double-anchoring organic dyes for dye-sensitized solar cells: the opto-electronic property and performance
Source: Royal Society of Chemistry journal article supplement (doi:10.1039/c7nj02181j), 2017-01-01
Supplement: c7nj02181j1.pdf [file c7nj02181j1.pdf]

## **Double-anchoring organic dyes for dye-sensitized solar cells: the opto-electronic property and performance**

---

**Table S1** Energy levels of dyes calculated by DFT/6-31G(d) in DMF

**Table S2** The FMO composition (%) of the individual groups for dye

**Table S3** Absorption properties of dyes in DMF solution calculated at the CAM-B3LYP/6-31G(d) level

**Table S4** Energy levels of dyes calculated by DFT/6-31G(d) in DMF after binding on the TiO<sub>2</sub>

**Table S5** Absorption properties of dyes in DMF solution calculated at the CAM-B3LYP/6-31G(d) level after binding on the TiO<sub>2</sub>

**Figure S1** Frontier molecular orbitals of dyes MA-201 – MA-206 and MA-2.

**Figure S2** Optimized geometries of dyes on TiO<sub>2</sub> cluster (only one anchoring moiety adsorption to TiO<sub>2</sub>)

---

**Table S1** Energy levels of dyes calculated by DFT/6-31G(d) in DMF

|     | MA-2  | MA-201 | MA-202 | MA-203 | MA-204 | MA-205 | MA-206 |
|-----|-------|--------|--------|--------|--------|--------|--------|
| L+2 | -2.46 | -1.70  | -1.79  | -2.12  | -1.79  | -1.96  | -1.88  |
| L+1 | -2.54 | -2.52  | -2.53  | -2.53  | -2.50  | -2.51  | -2.51  |
| L   | -2.63 | -2.60  | -2.60  | 2.60   | -2.59  | -2.59  | -2.58  |
| H   | -5.32 | -5.07  | -5.12  | -5.08  | -4.85  | -4.96  | -4.68  |
| H-1 | -5.53 | -5.45  | -5.50  | -5.50  | -5.39  | -5.40  | -5.37  |

**Table S2** The FMO composition (%) of the individual groups for dye

| Dye    |                | H  | L  | L+1 | L+2 |
|--------|----------------|----|----|-----|-----|
| MA-2   | A <sub>1</sub> | 3  | 2  | 70  | 0   |
|        | D <sub>1</sub> | 53 | 4  | 27  | 0   |
|        | $\pi$ -spacer  | 7  | 91 | 3   | 2   |
|        | D <sub>2</sub> | 34 | 3  | 0   | 31  |
|        | A <sub>2</sub> | 2  | 1  | 0   | 67  |
| MA-201 | A <sub>1</sub> | 3  | 0  | 67  | 3   |
|        | D <sub>1</sub> | 53 | 0  | 30  | 18  |
|        | $\pi$ -spacer  | 23 | 1  | 2   | 51  |
|        | D <sub>2</sub> | 19 | 34 | 1   | 26  |
|        | A <sub>2</sub> | 1  | 64 | 1   | 2   |
| MA-202 | A <sub>1</sub> | 2  | 1  | 69  | 2   |
|        | D <sub>1</sub> | 40 | 0  | 29  | 19  |
|        | $\pi$ -spacer  | 35 | 1  | 1   | 58  |
|        | D <sub>2</sub> | 22 | 32 | 0   | 19  |
|        | A <sub>2</sub> | 1  | 66 | 1   | 2   |
| MA-203 | A <sub>1</sub> | 1  | 60 | 8   | 2   |
|        | D <sub>1</sub> | 22 | 27 | 3   | 11  |
|        | $\pi$ -spacer  | 38 | 3  | 2   | 72  |
|        | D <sub>2</sub> | 37 | 3  | 27  | 11  |
|        | A <sub>2</sub> | 2  | 6  | 60  | 3   |
| MA-204 | A <sub>1</sub> | 2  | 4  | 63  | 3   |
|        | D <sub>1</sub> | 32 | 2  | 29  | 18  |
|        | $\pi$ -spacer  | 47 | 1  | 1   | 61  |
|        | D <sub>2</sub> | 17 | 29 | 2   | 17  |
|        | A <sub>2</sub> | 1  | 64 | 5   | 1   |
| MA-205 | A <sub>1</sub> | 3  | 12 | 54  | 2   |
|        | D <sub>1</sub> | 41 | 6  | 26  | 13  |
|        | $\pi$ -spacer  | 38 | 1  | 1   | 76  |
|        | D <sub>2</sub> | 17 | 24 | 5   | 9   |
|        | A <sub>2</sub> | 1  | 57 | 13  | 1   |
| MA-206 | A <sub>1</sub> | 1  | 66 | 1   | 1   |
|        | D <sub>1</sub> | 12 | 31 | 0   | 12  |
|        | $\pi$ -spacer  | 71 | 1  | 1   | 72  |
|        | D <sub>2</sub> | 16 | 0  | 29  | 13  |
|        | A <sub>2</sub> | 1  | 1  | 69  | 2   |

**Table S3** Absorption properties of dyes in DMF solution calculated at the CAM-B3LYP/6-31G(d) level

| Dye    | State | $E_g / \lambda_{\max}$ | f      | main configurations |
|--------|-------|------------------------|--------|---------------------|
| MA-2   | 1     | 2.74/452               | 0.7044 | H→L/0.59913         |
|        | 2     | 3.02/411               | 0.4395 | H→L+1/0.42346       |
|        | 3     | 3.09/402               | 0.1866 | H→L+2/0.39541       |
|        | 4     | 3.34/371               | 0.0767 | H-1→L/0.59813       |
|        | 5     | 3.71/334               | 0.0484 | H-2→L/0.53810       |
|        | 6     | 4.01/309               | 0.0296 | H→L+4/0.30999       |
| MA-201 | 1     | 2.82/439               | 1.1196 | H→L+1/0.51485       |
|        | 2     | 3.05/407               | 0.8622 | H-1→L/0.51160       |
|        | 3     | 3.56/348               | 0.9752 | H→L+2/0.55304       |
|        | 4     | 3.98/311               | 0.1977 | H→L+3/0.39019       |
|        | 5     | 4.04/307               | 0.1527 | H-4→L+1/0.30361     |
|        | 6     | 4.07/305               | 0.0696 | H-5→L/0.31842       |
| MA-202 | 1     | 3.00/414               | 1.7312 | H→L/0.38446         |
|        | 2     | 3.10/400               | 0.6524 | H→L+1/0.37626       |
|        | 3     | 3.47/357               | 0.7173 | H→L+2/0.56013       |
|        | 4     | 4.05/306               | 0.0170 | H-5→L/0.31234       |
|        | 5     | 4.10/303               | 0.0515 | H-1→L+2/0.27903     |
|        | 6     | 4.13/301               | 0.0544 | H→L/0.31804         |
| MA-203 | 1     | 2.82/439               | 1.5308 | H→L+2/0.46824       |
|        | 2     | 3.08/403               | 0.7822 | H-1→L/0.39951       |
|        | 3     | 3.20/387               | 0.3009 | H→L+2/0.38065       |
|        | 4     | 3.99/311               | 0.0001 | H-1→L+2/0.50291     |
|        | 5     | 4.07/304               | 0.0334 | H-4→L/0.37084       |
|        | 6     | 4.10/303               | 0.0845 | H-3→L+1/0.34296     |
| MA-204 | 1     | 2.77/447               | 1.4343 | H→L+1/0.38859       |
|        | 2     | 2.98/415               | 1.0761 | H-1→L/0.38501       |
|        | 3     | 3.24/382               | 0.4924 | H→L+2/0.50770       |
|        | 4     | 3.86/321               | 0.0987 | H→L/0.49334         |
|        | 5     | 3.94/315               | 0.0045 | H→L+1/0.40435       |
|        | 6     | 3.97/313               | 0.0433 | H→L+3/0.36275       |
| MA-205 | 1     | 2.78/446               | 1.2388 | H→L+2/0.36905       |

---

|        |   |          |        |                 |
|--------|---|----------|--------|-----------------|
|        | 2 | 2.99/415 | 1.1965 | H-1→L/0.38131   |
|        | 3 | 3.17/391 | 0.2227 | H→L+2/0.45767   |
|        | 4 | 3.94/314 | 0.0221 | H-1→L+2/0.42259 |
|        | 5 | 3.98/312 | 0.0760 | H→L/0.40889     |
|        | 6 | 4.04/307 | 0.0336 | H-3→L+1/0.30766 |
| MA-206 | 1 | 2.71/458 | 2.4062 | H→L+2/0.55787   |
|        | 2 | 3.01/412 | 0.6791 | H-1→L/0.34804   |
|        | 3 | 3.13/396 | 0.3202 | H-1→L+1/0.35193 |
|        | 4 | 3.69/336 | 0.1339 | H→L/0.52766     |
|        | 5 | 3.74/331 | 0.0812 | H→L+1/0.50059   |
|        | 6 | 3.80/326 | 0.0026 | H→L+3/0.47480   |

---

---

**Table S4** Energy levels of dyes calculated by DFT/6-31G(d) in DMF after binding on the TiO<sub>2</sub>

---

|          | H     | L     | $\Delta E_{H-L}$ |
|----------|-------|-------|------------------|
| MA-2T1   | -5.35 | -3.27 | 2.08             |
| MA-201T1 | -5.06 | -3.28 | 1.78             |
| MA-202T1 | -5.10 | -3.26 | 1.84             |
| MA-203T1 | -5.09 | -3.28 | 1.81             |
| MA-204T1 | -4.85 | -3.29 | 1.56             |
| MA-205T1 | -4.95 | -3.30 | 1.66             |
| MA-206T1 | -4.67 | -3.28 | 1.39             |
| MA-2T2   | -5.36 | -3.28 | 2.08             |
| MA-201T2 | -5.12 | -3.30 | 1.82             |
| MA-202T2 | -5.13 | -3.30 | 1.83             |
| MA-203T2 | -5.11 | -3.28 | 1.83             |
| MA-204T2 | -4.90 | -3.28 | 1.62             |
| MA-205T2 | -4.99 | -3.27 | 1.72             |
| MA-206T2 | -4.67 | -3.29 | 1.38             |

---

Dye/T1 represents only one anchoring moiety adsorption to TiO<sub>2</sub>

Dye/T2 represents two anchoring moieties adsorption to TiO<sub>2</sub>

**Table S5** Absorption properties of dyes in DMF solution calculated at the CAM-B3LYP/6-31G(d) level after binding on the TiO<sub>2</sub>

| Dye      | State | $E_g / \lambda_{\max}$ | f      | main configurations |
|----------|-------|------------------------|--------|---------------------|
| MA-2T1   | 1     | 2.86/433               | 1.3623 | H→L+3/0.43963       |
|          | 2     | 3.06/406               | 0.7783 | H→L+7/0.49831       |
|          | 3     | 3.25/381               | 0.2438 | H→L+9/0.49710       |
|          | 4     | 3.82/324               | 0.0094 | H-1→L+9/0.47011     |
|          | 5     | 3.90/318               | 0.0135 | H→L/0.58291         |
|          | 6     | 3.93/316               | 0.3832 | H-9→L+3/0.20062     |
| MA-201T1 | 1     | 2.79/444               | 1.2545 | H→L+8/0.48065       |
|          | 2     | 2.89/429               | 0.9677 | H-1→L+3/0.42936     |
|          | 3     | 3.54/350               | 0.9789 | H-1→L+8/0.18849     |
|          | 4     | 3.71/334               | 0.0046 | H→L/0.65720         |
|          | 5     | 3.84/323               | 0.0673 | H→L+3/0.54129       |
|          | 6     | 3.92/316               | 0.0000 | H→L+1/0.66573       |
| MA-202T1 | 1     | 2.82/439               | 1.6661 | H-1→L+3/0.39575     |
|          | 2     | 3.05/406               | 1.0447 | H→L+8/0.40067       |
|          | 3     | 3.42/363               | 0.6705 | H-1→L+8/0.21116     |
|          | 4     | 3.75/331               | 0.0002 | H→L/0.65731         |
|          | 5     | 3.90/318               | 0.0152 | H→L+3/0.45183       |
|          | 6     | 3.92/316               | 0.0003 | H→L+1/0.63521       |
| MA-203T1 | 1     | 2.75/450               | 1.6316 | H→L+3/0.37292       |
|          | 2     | 2.98/417               | 0.8932 | H→L+8/0.29596       |
|          | 3     | 3.18/389               | 0.3845 | H→L+14/0.27462      |
|          | 4     | 3.72/334               | 0.0012 | H→L/0.66174         |
|          | 5     | 3.88/319               | 0.0591 | H→L+3/0.49248       |
|          | 6     | 3.91/317               | 0.0000 | H→L+1/0.66345       |
| MA-204T1 | 1     | 2.73/455               | 1.4503 | H-1→L+3/0.31198     |
|          | 2     | 2.87/431               | 1.1998 | H→L+8/0.37020       |
|          | 3     | 3.21/386               | 0.6087 | H→L+18/0.52591      |
|          | 4     | 3.49/356               | 0.0071 | H→L/0.68593         |
|          | 5     | 364/341                | 0.1591 | H→L+3/0.53165       |

|          |   |          |        |                  |
|----------|---|----------|--------|------------------|
|          | 6 | 3.70/336 | 0.0003 | H→L+1/0.68744    |
| MA-205T1 | 1 | 2.71/458 | 1.2225 | H→L+3/0.30600    |
|          | 2 | 2.87/432 | 1.4103 | H→L+8/0.37832    |
|          | 3 | 3.12/398 | 0.3298 | H→L+15/0.38410   |
|          | 4 | 3.57/347 | 0.0037 | H→L/0.67758      |
|          | 5 | 3.73/333 | 0.0928 | H→L+3/0.53743    |
|          | 6 | 3.77/329 | 0.0009 | H→L+1/0.67253    |
| MA-206T1 | 1 | 2.69/460 | 2.1901 | H→L+17/0.46811   |
|          | 2 | 2.90/427 | 1.1481 | H→L+17/0.30197   |
|          | 3 | 3.11/399 | 0.2736 | H-1→L+8/0.41088  |
|          | 4 | 3.33/373 | 0.0181 | H→L/0.68742      |
|          | 5 | 3.45/359 | 0.1657 | H→L+3/0.55030    |
|          | 6 | 3.53/351 | 0.0001 | H→L+1/0.69802    |
| MA-2T2   | 1 | 2.82/439 | 1.3786 | H→L+6/0.44423    |
|          | 2 | 2.92/425 | 1.0984 | H-1→L+6/0.43939  |
|          | 3 | 3.20/387 | 0.2118 | H→L+16/0.41238   |
|          | 4 | 3.81/325 | 0.0105 | H-1→L+16/0.42968 |
|          | 5 | 3.87/320 | 0.0031 | H→L/0.60712      |
|          | 6 | 3.90/318 | 0.0828 | H→L+1/0.50994    |
| MA-201T2 | 1 | 2.63/472 | 1.4300 | H→L+6/0.45838    |
|          | 2 | 2.86/433 | 1.1245 | H→L+7/0.32315    |
|          | 3 | 3.51/353 | 0.9286 | H-2→L+6/0.20926  |
|          | 4 | 3.61/344 | 0.0214 | H→L+1/0.64994    |
|          | 5 | 3.72/333 | 0.0010 | H→L/0.65006      |
|          | 6 | 3.82/325 | 0.0000 | H→L+3/0.64997    |
| MA-202T2 | 1 | 2.79/444 | 2.1888 | H→L+6/0.40192    |
|          | 2 | 2.87/432 | 0.7014 | H-1→L+6/0.42178  |
|          | 3 | 3.38/367 | 0.8093 | H→L+32/0.56328   |
|          | 4 | 3.72/333 | 0.0008 | H→L/0.65964      |
|          | 5 | 3.74/332 | 0.0004 | H→L+1/0.65809    |
|          | 6 | 3.86/321 | 0.0408 | H→L+7/0.42417    |
| MA-203T2 | 1 | 2.73/455 | 1.8314 | H→L+6/0.37495    |
|          | 2 | 2.89/429 | 0.9189 | H→L+7/0.37559    |
|          | 3 | 3.08/403 | 0.4754 | H→L+24/0.42822   |
|          | 4 | 3.72/334 | 0.0021 | H→L/0.66404      |



|          |   |          |        |                 |
|----------|---|----------|--------|-----------------|
|          | 5 | 3.74/332 | 0.0019 | H→L+1/0.66644   |
|          | 6 | 3.86/321 | 0.0659 | H→L+6/0.37937   |
| MA-204T2 | 1 | 2.63/471 | 1.4318 | H→L+6/0.44636   |
|          | 2 | 2.81/442 | 1.3371 | H→L+7/0.38581   |
|          | 3 | 3.19/389 | 0.7705 | H→L+34/0.27388  |
|          | 4 | 3.50/354 | 0.0012 | H→L+1/0.67909   |
|          | 5 | 3.53/351 | 0.0059 | H→L/0.68439     |
|          | 6 | 3.65/340 | 0.1245 | H→L+7/0.53089   |
| MA-205T2 | 1 | 2.62/474 | 1.2914 | H→L+6/0.44708   |
|          | 2 | 2.80/443 | 1.5458 | H→L+7/0.38335   |
|          | 3 | 3.08/402 | 0.4115 | H→L+30/0.34438  |
|          | 4 | 3.57/347 | 0.0005 | H→L/0.66035     |
|          | 5 | 3.63/342 | 0.0032 | H→L+1/0.66932   |
|          | 6 | 3.75/330 | 0.0786 | H→L+7/0.50969   |
| MA-206T2 | 1 | 2.63/472 | 2.5185 | H→L+6/0.31561   |
|          | 2 | 2.80/443 | 0.9309 | H→L+7/0.36246   |
|          | 3 | 2.98/416 | 0.4657 | H-1→L+7/0.27886 |
|          | 4 | 3.31/374 | 0.0107 | H→L/0.69218     |
|          | 5 | 3.33/373 | 0.0132 | H→L+1/0.68932   |
|          | 6 | 3.45/360 | 0.1679 | H→L+6/0.44191   |

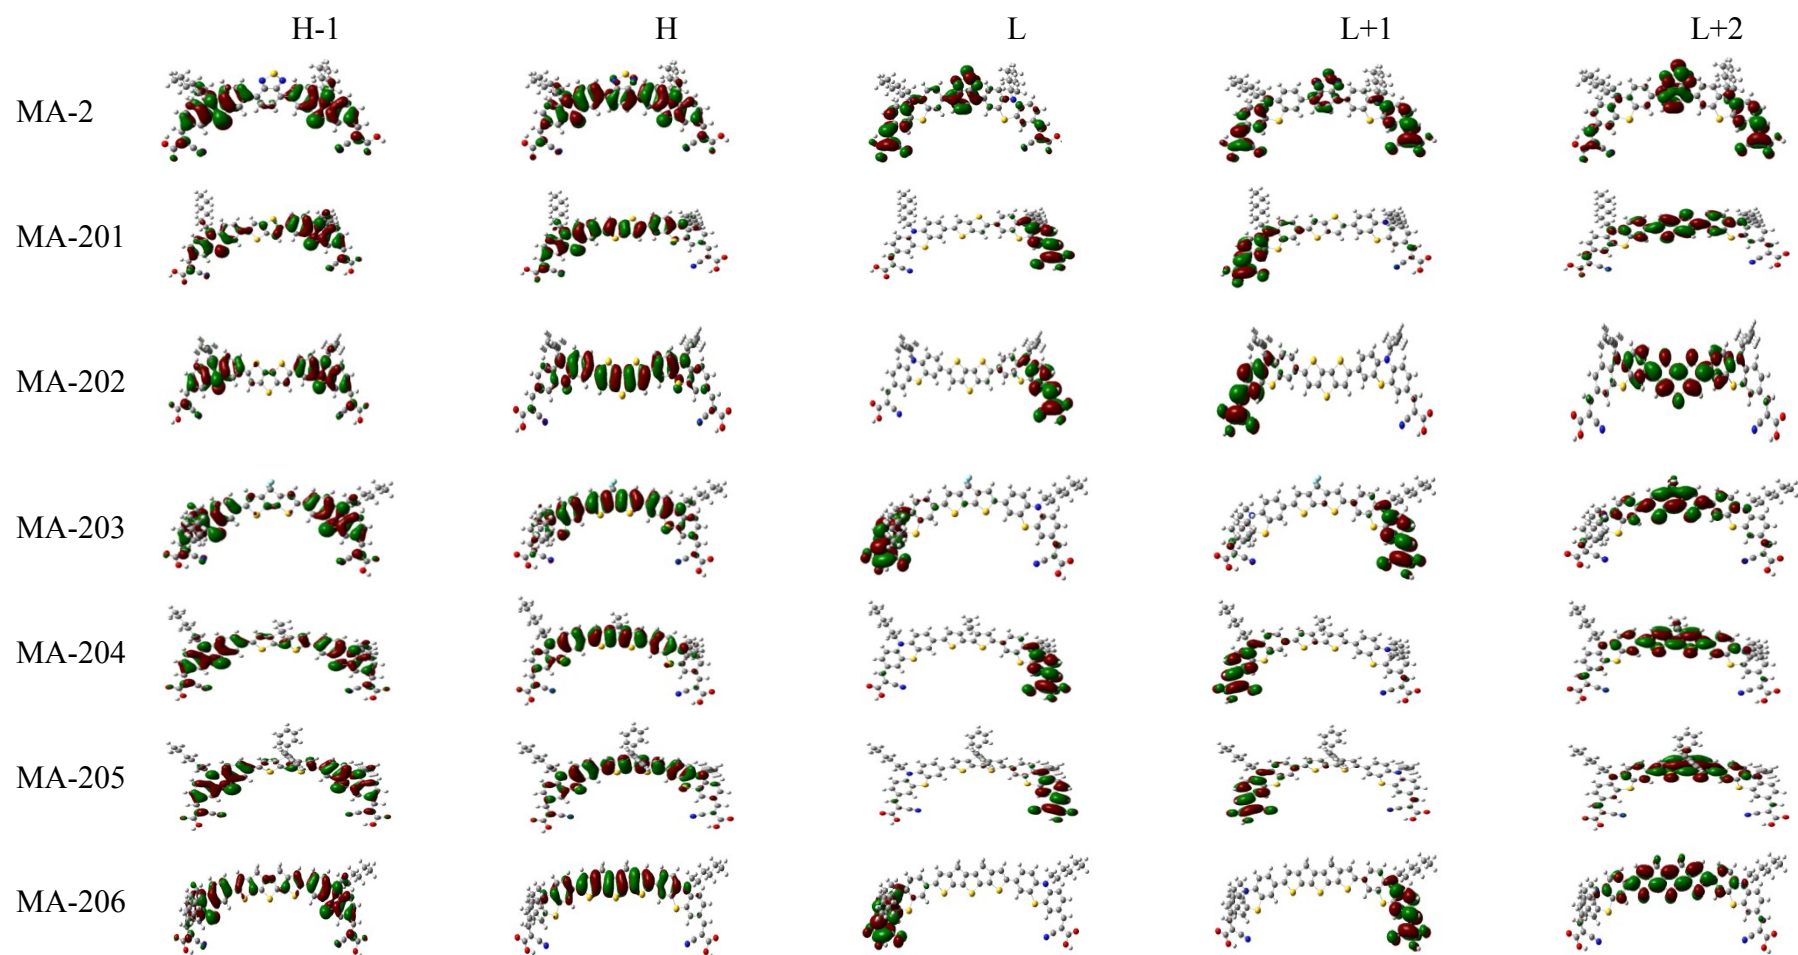

**Figure S1** Frontier molecular orbitals of dyes MA-201 – MA-206 and MA-2.

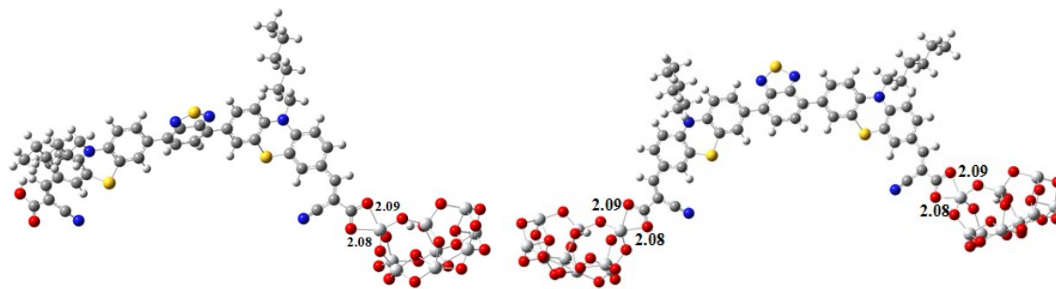

MA-2T1

MA-2T2

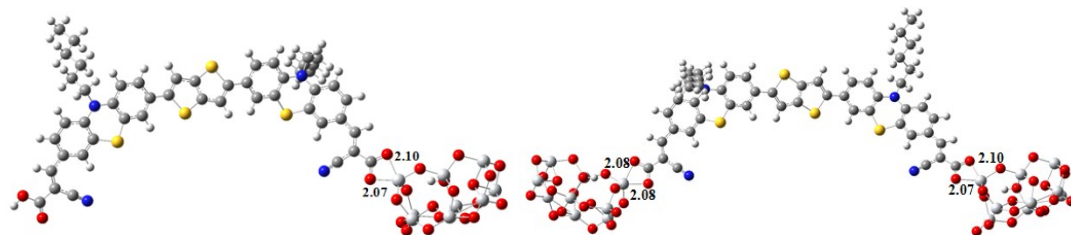

MA-201T1

MA-201T2

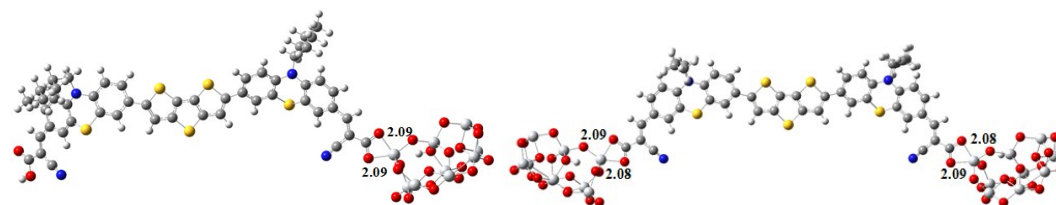

MA-202T1

MA-202T2

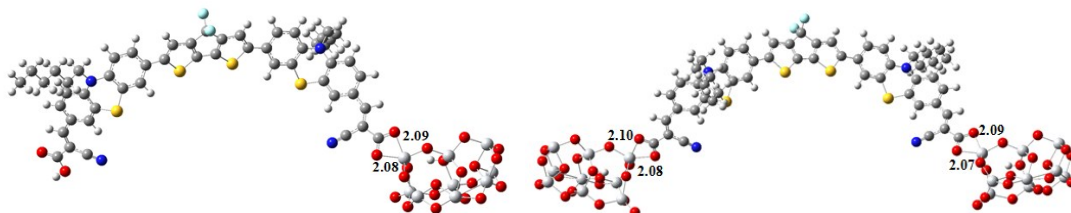

MA-203T1

MA-203T2

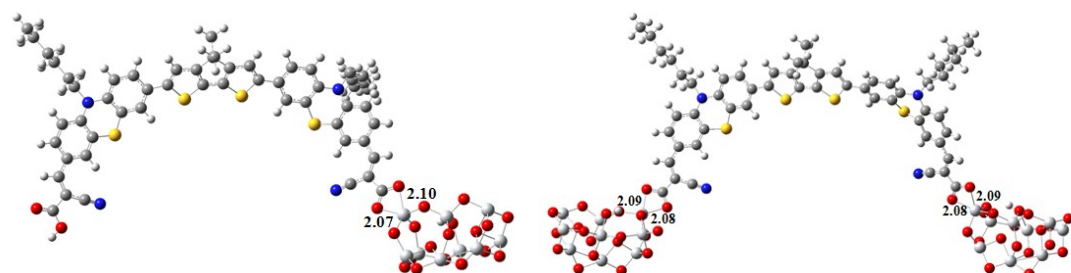

MA-204T1

MA-204T2

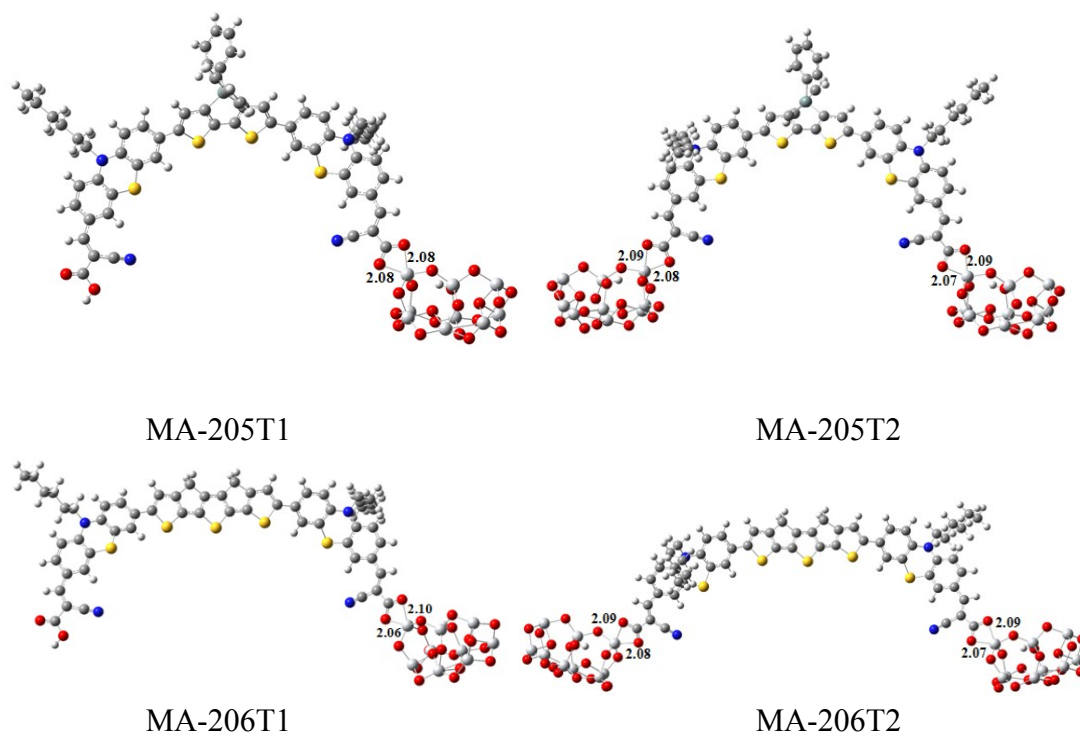

**Figure S2** Optimized geometries of dyes on  $\text{TiO}_2$  cluster (only one anchoring moiety adsorption to  $\text{TiO}_2$ )
